# Supplementary material for: Keratin protein nanofibers from merino wool yarn: a top-down approach for the disintegration of hierarchical wool architecture to extract α-keratin protein nanofibers
Source: Royal Society of Chemistry journal article supplement (doi:10.1039/d3ra07063h), 2024-01-01
Supplement: d3ra07063h1.pdf [file d3ra07063h1.pdf]

Supporting information

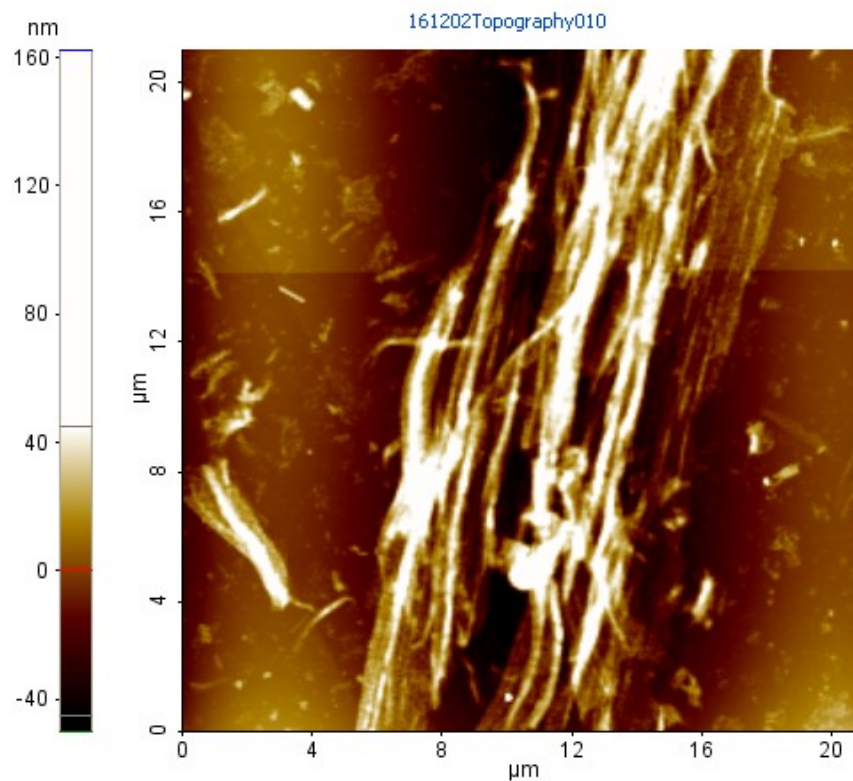

Figure S1: AFM topographical image of the 5 M wool samples subjected to direct sonication in 1.5% acetic acid medium

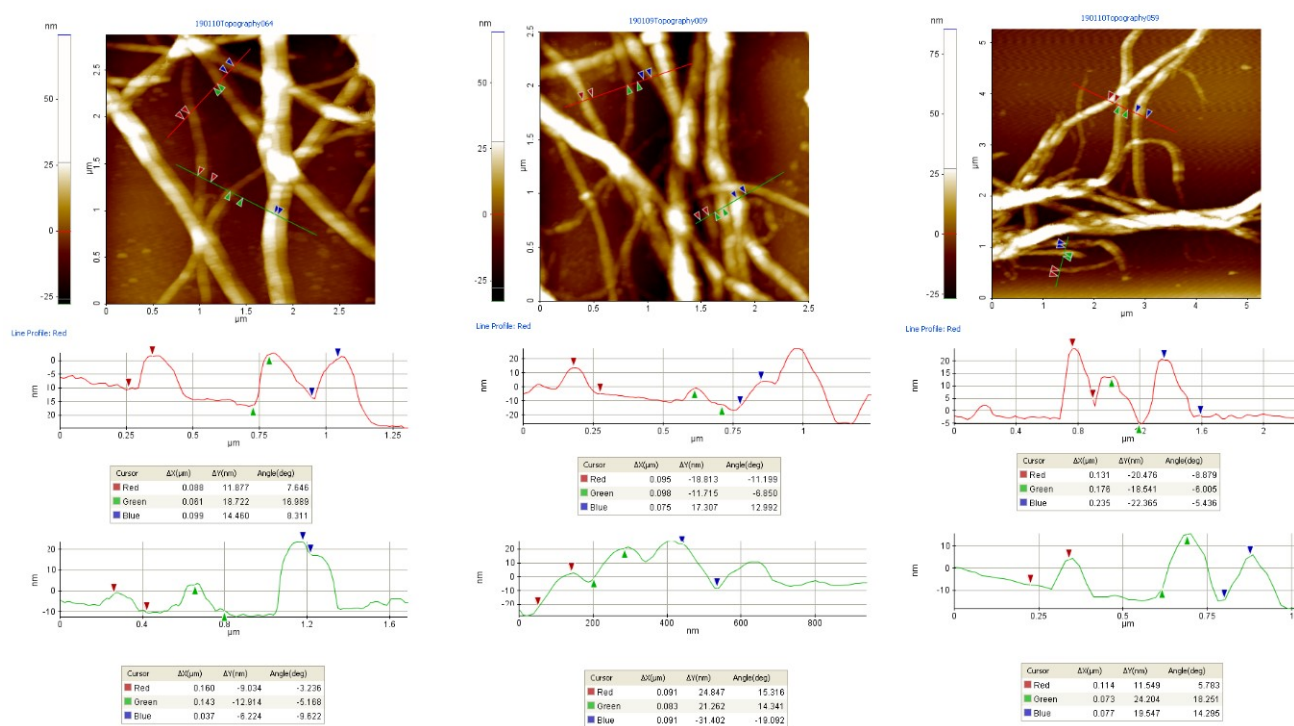

Figure S2: AFM topographical image of the protein nano fibers obtained by subjecting the 5 M wool to high speed blending in 1.5% acetic acid medium

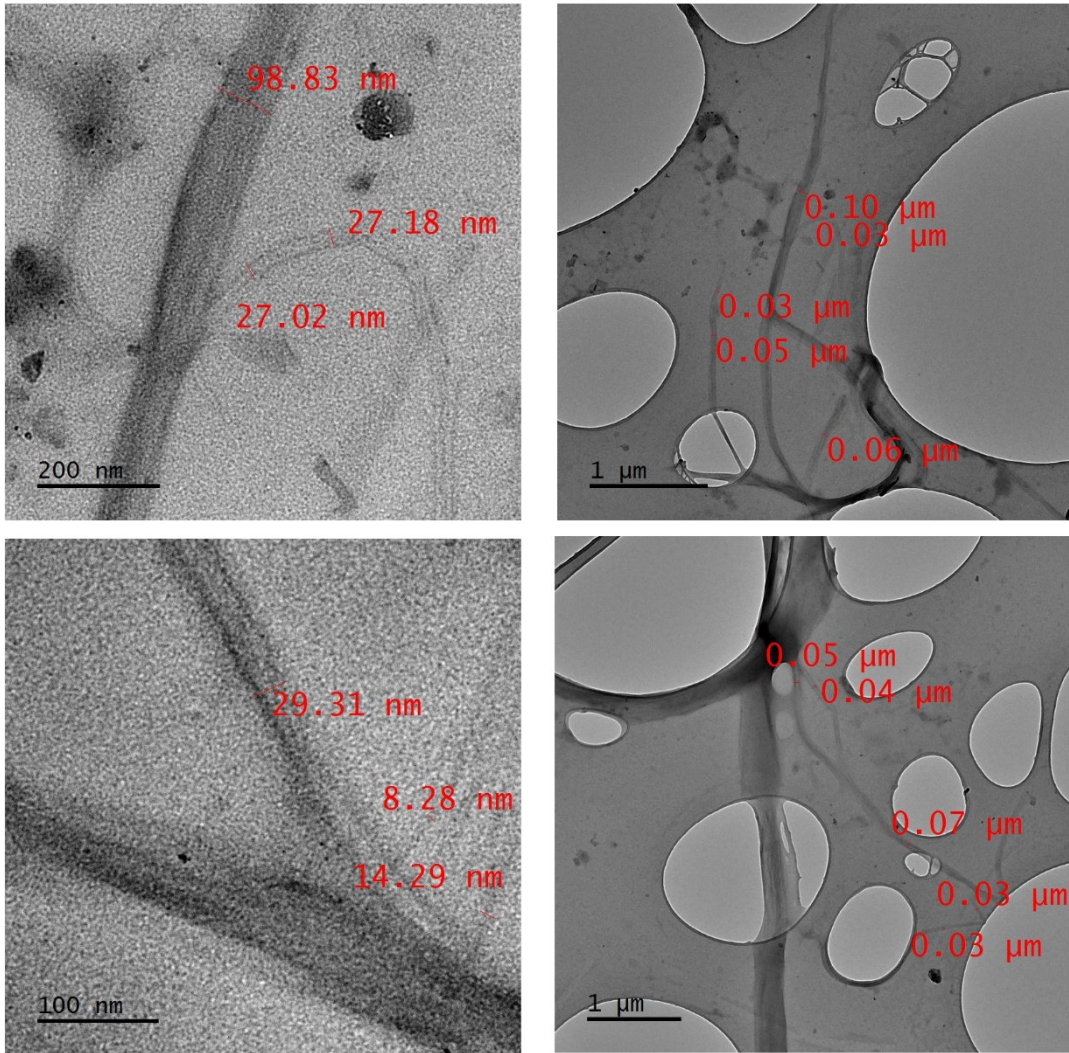

Figure S3: TEM images of the protein nano fibers obtained by subjecting the 5 M wool to high speed blending in 1.5% acetic acid medium

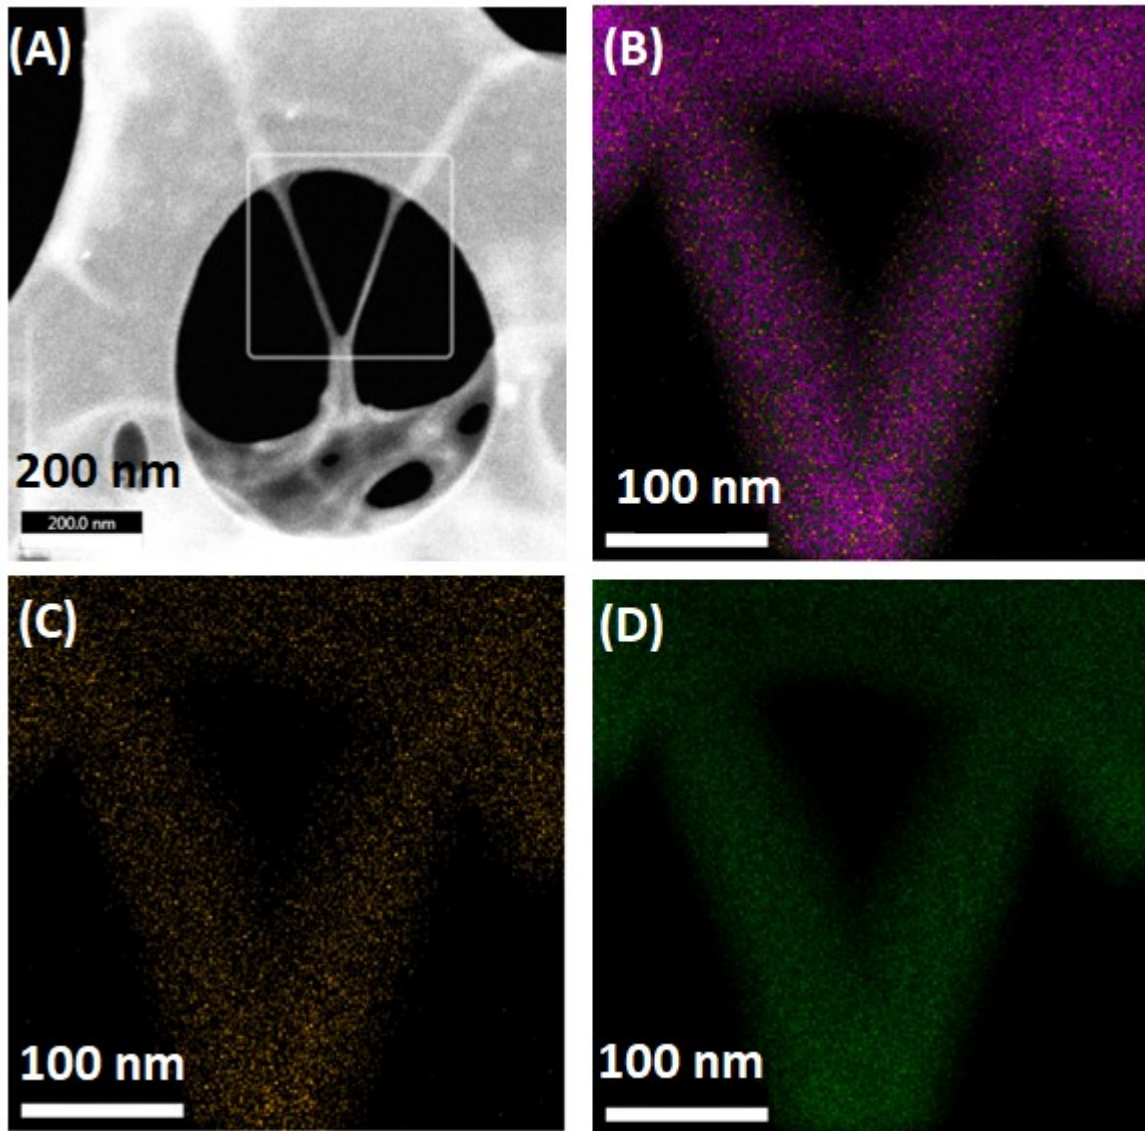

Figure S4: TEM EDX analysis of the protein nano fibers (A) Gray map (B) C map (C) N map (D) O map
